# Supplementary material
Source: publisher figshare collection journal article supplement (https://gsajournals.figshare.com/articles/dataset/_/9872126)

A

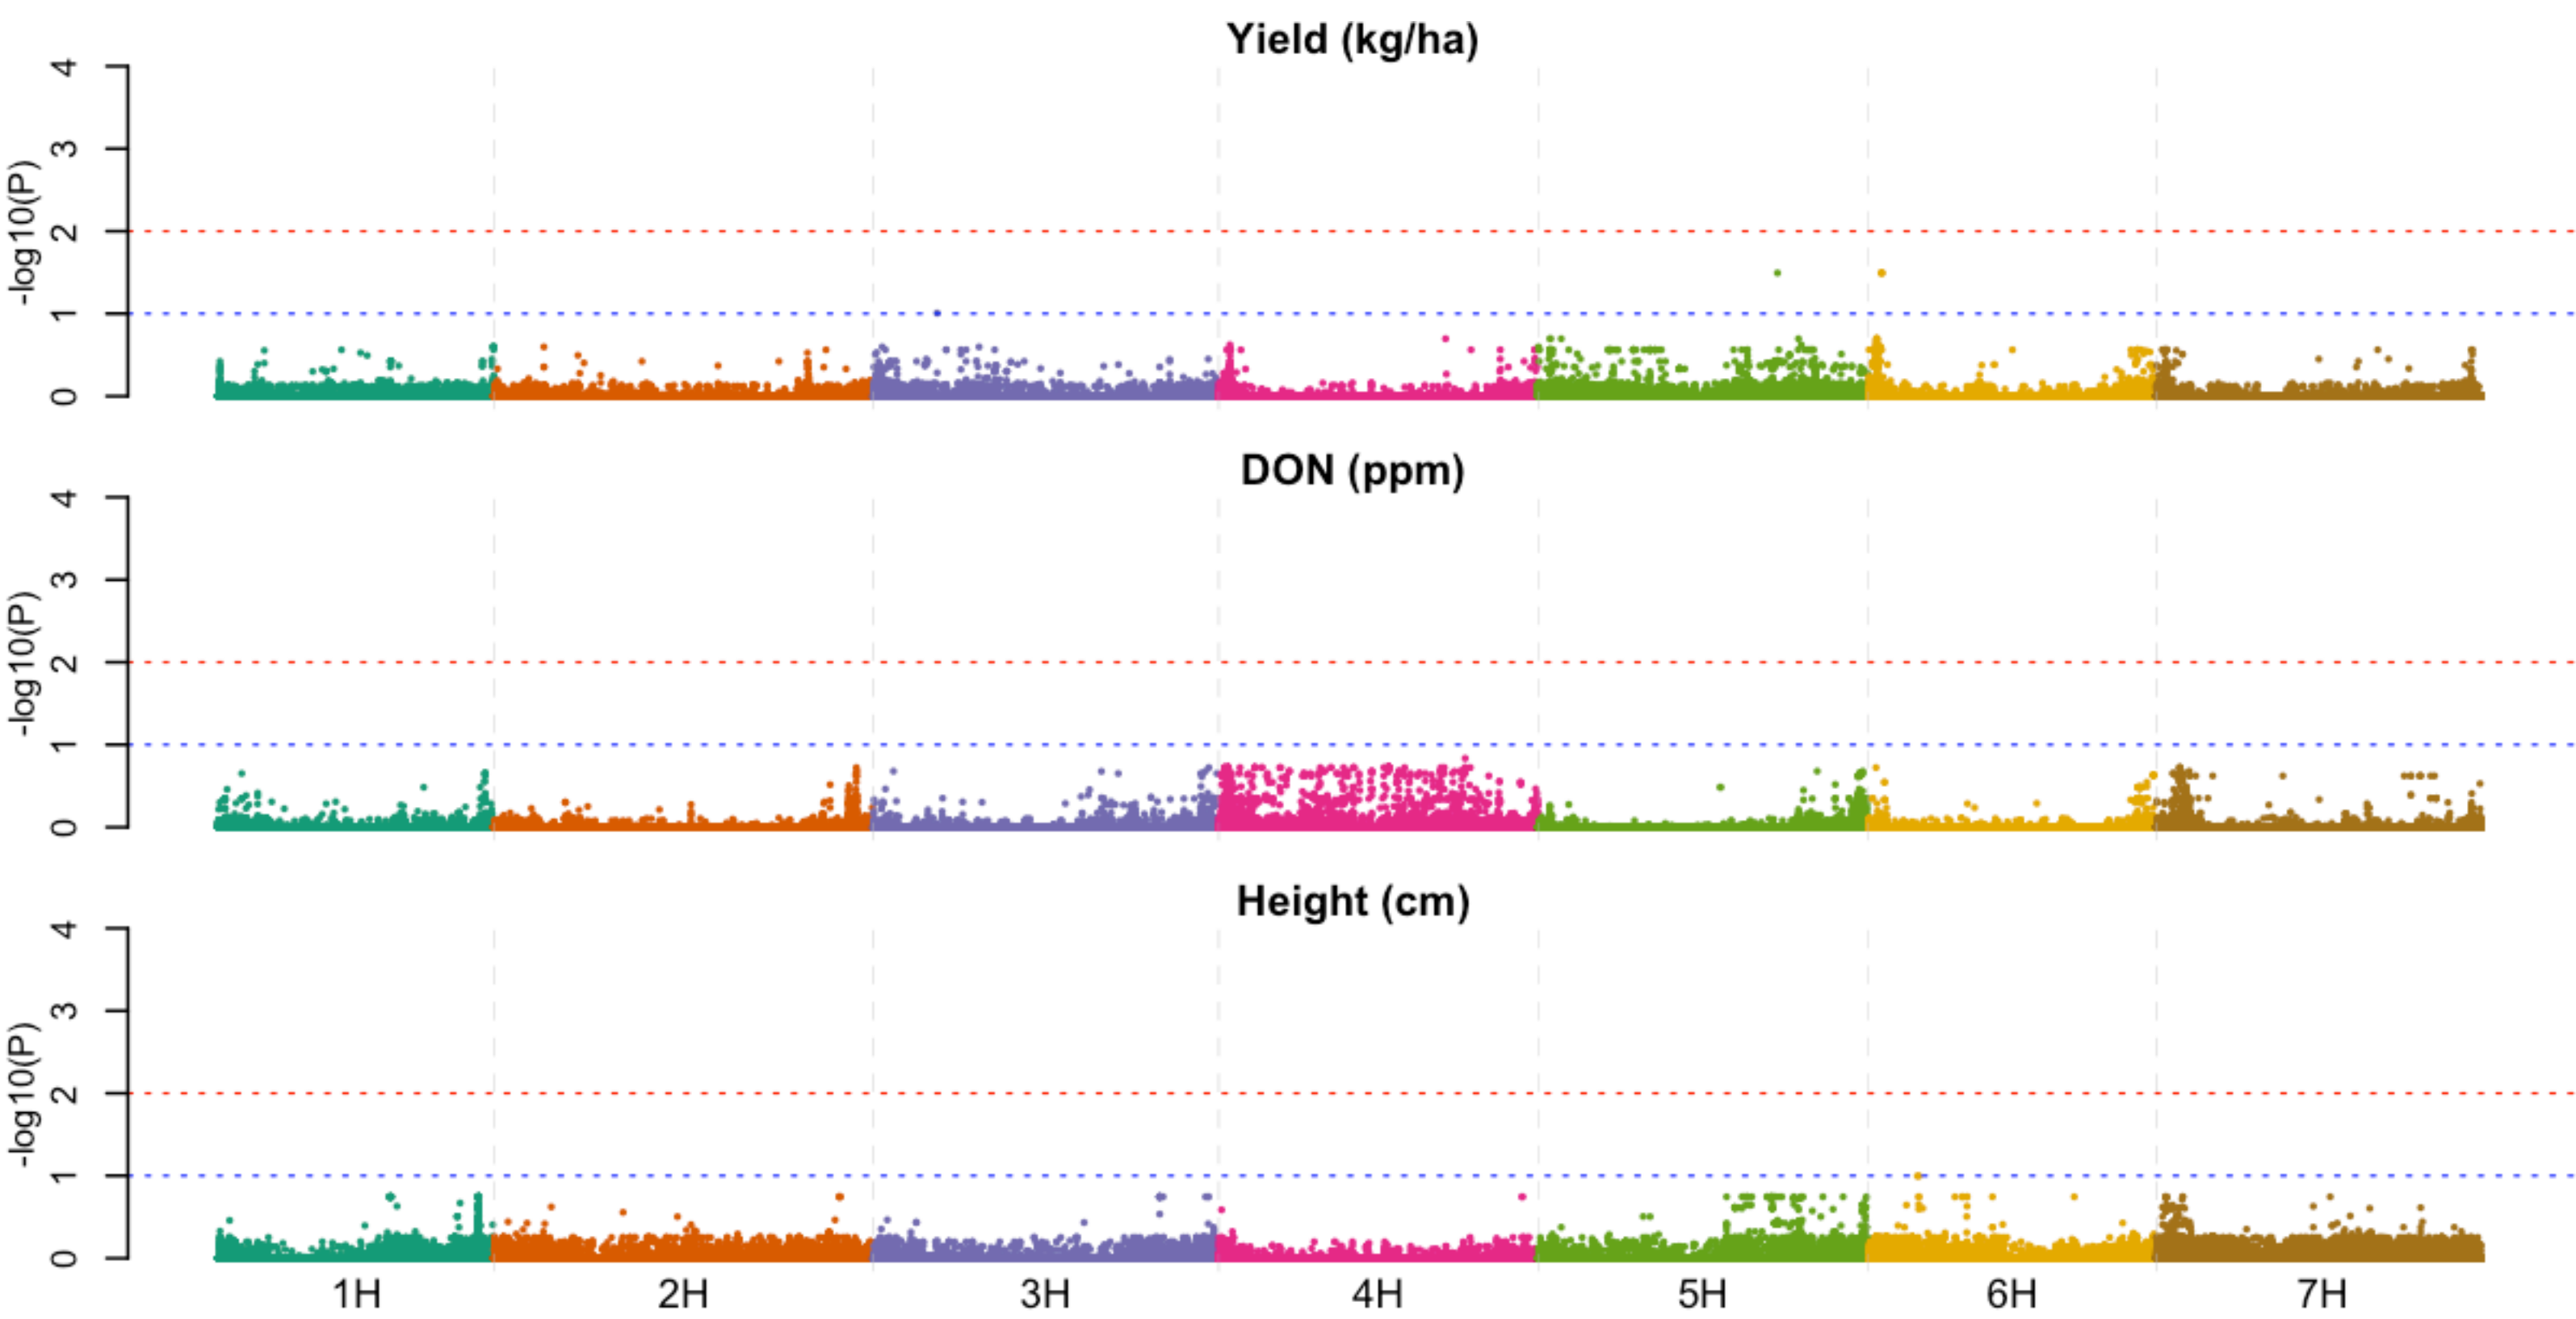

B

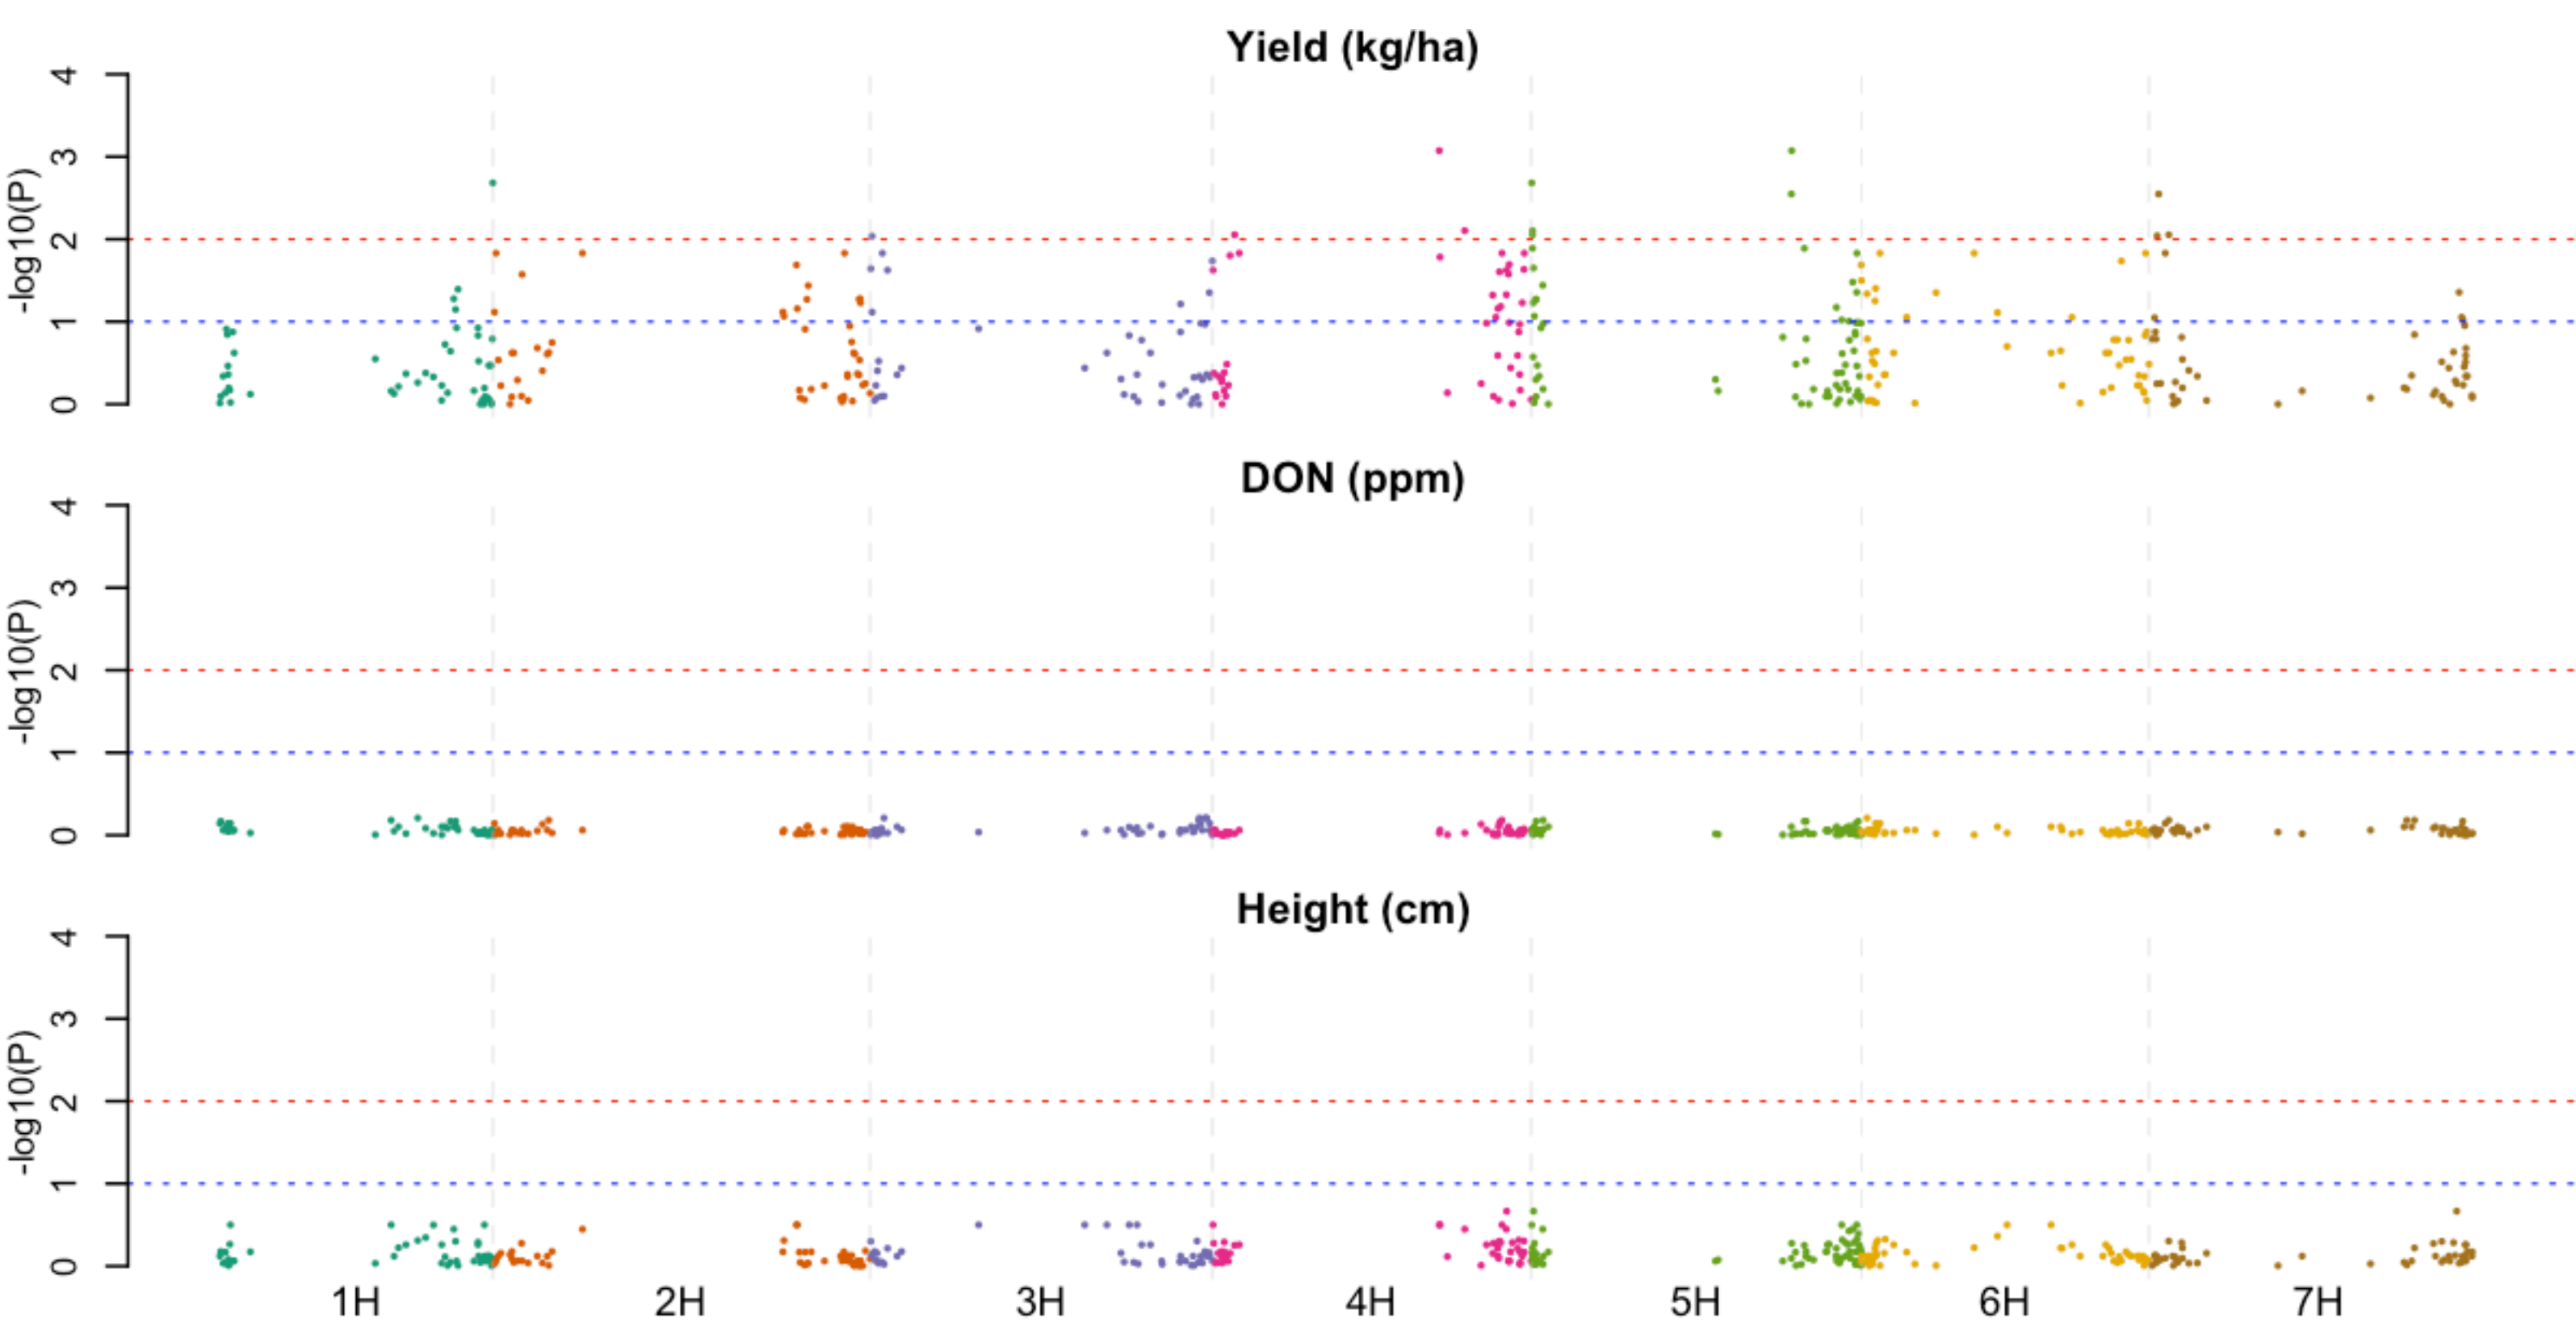

Supplement: Supplementary file 1 [file 3]

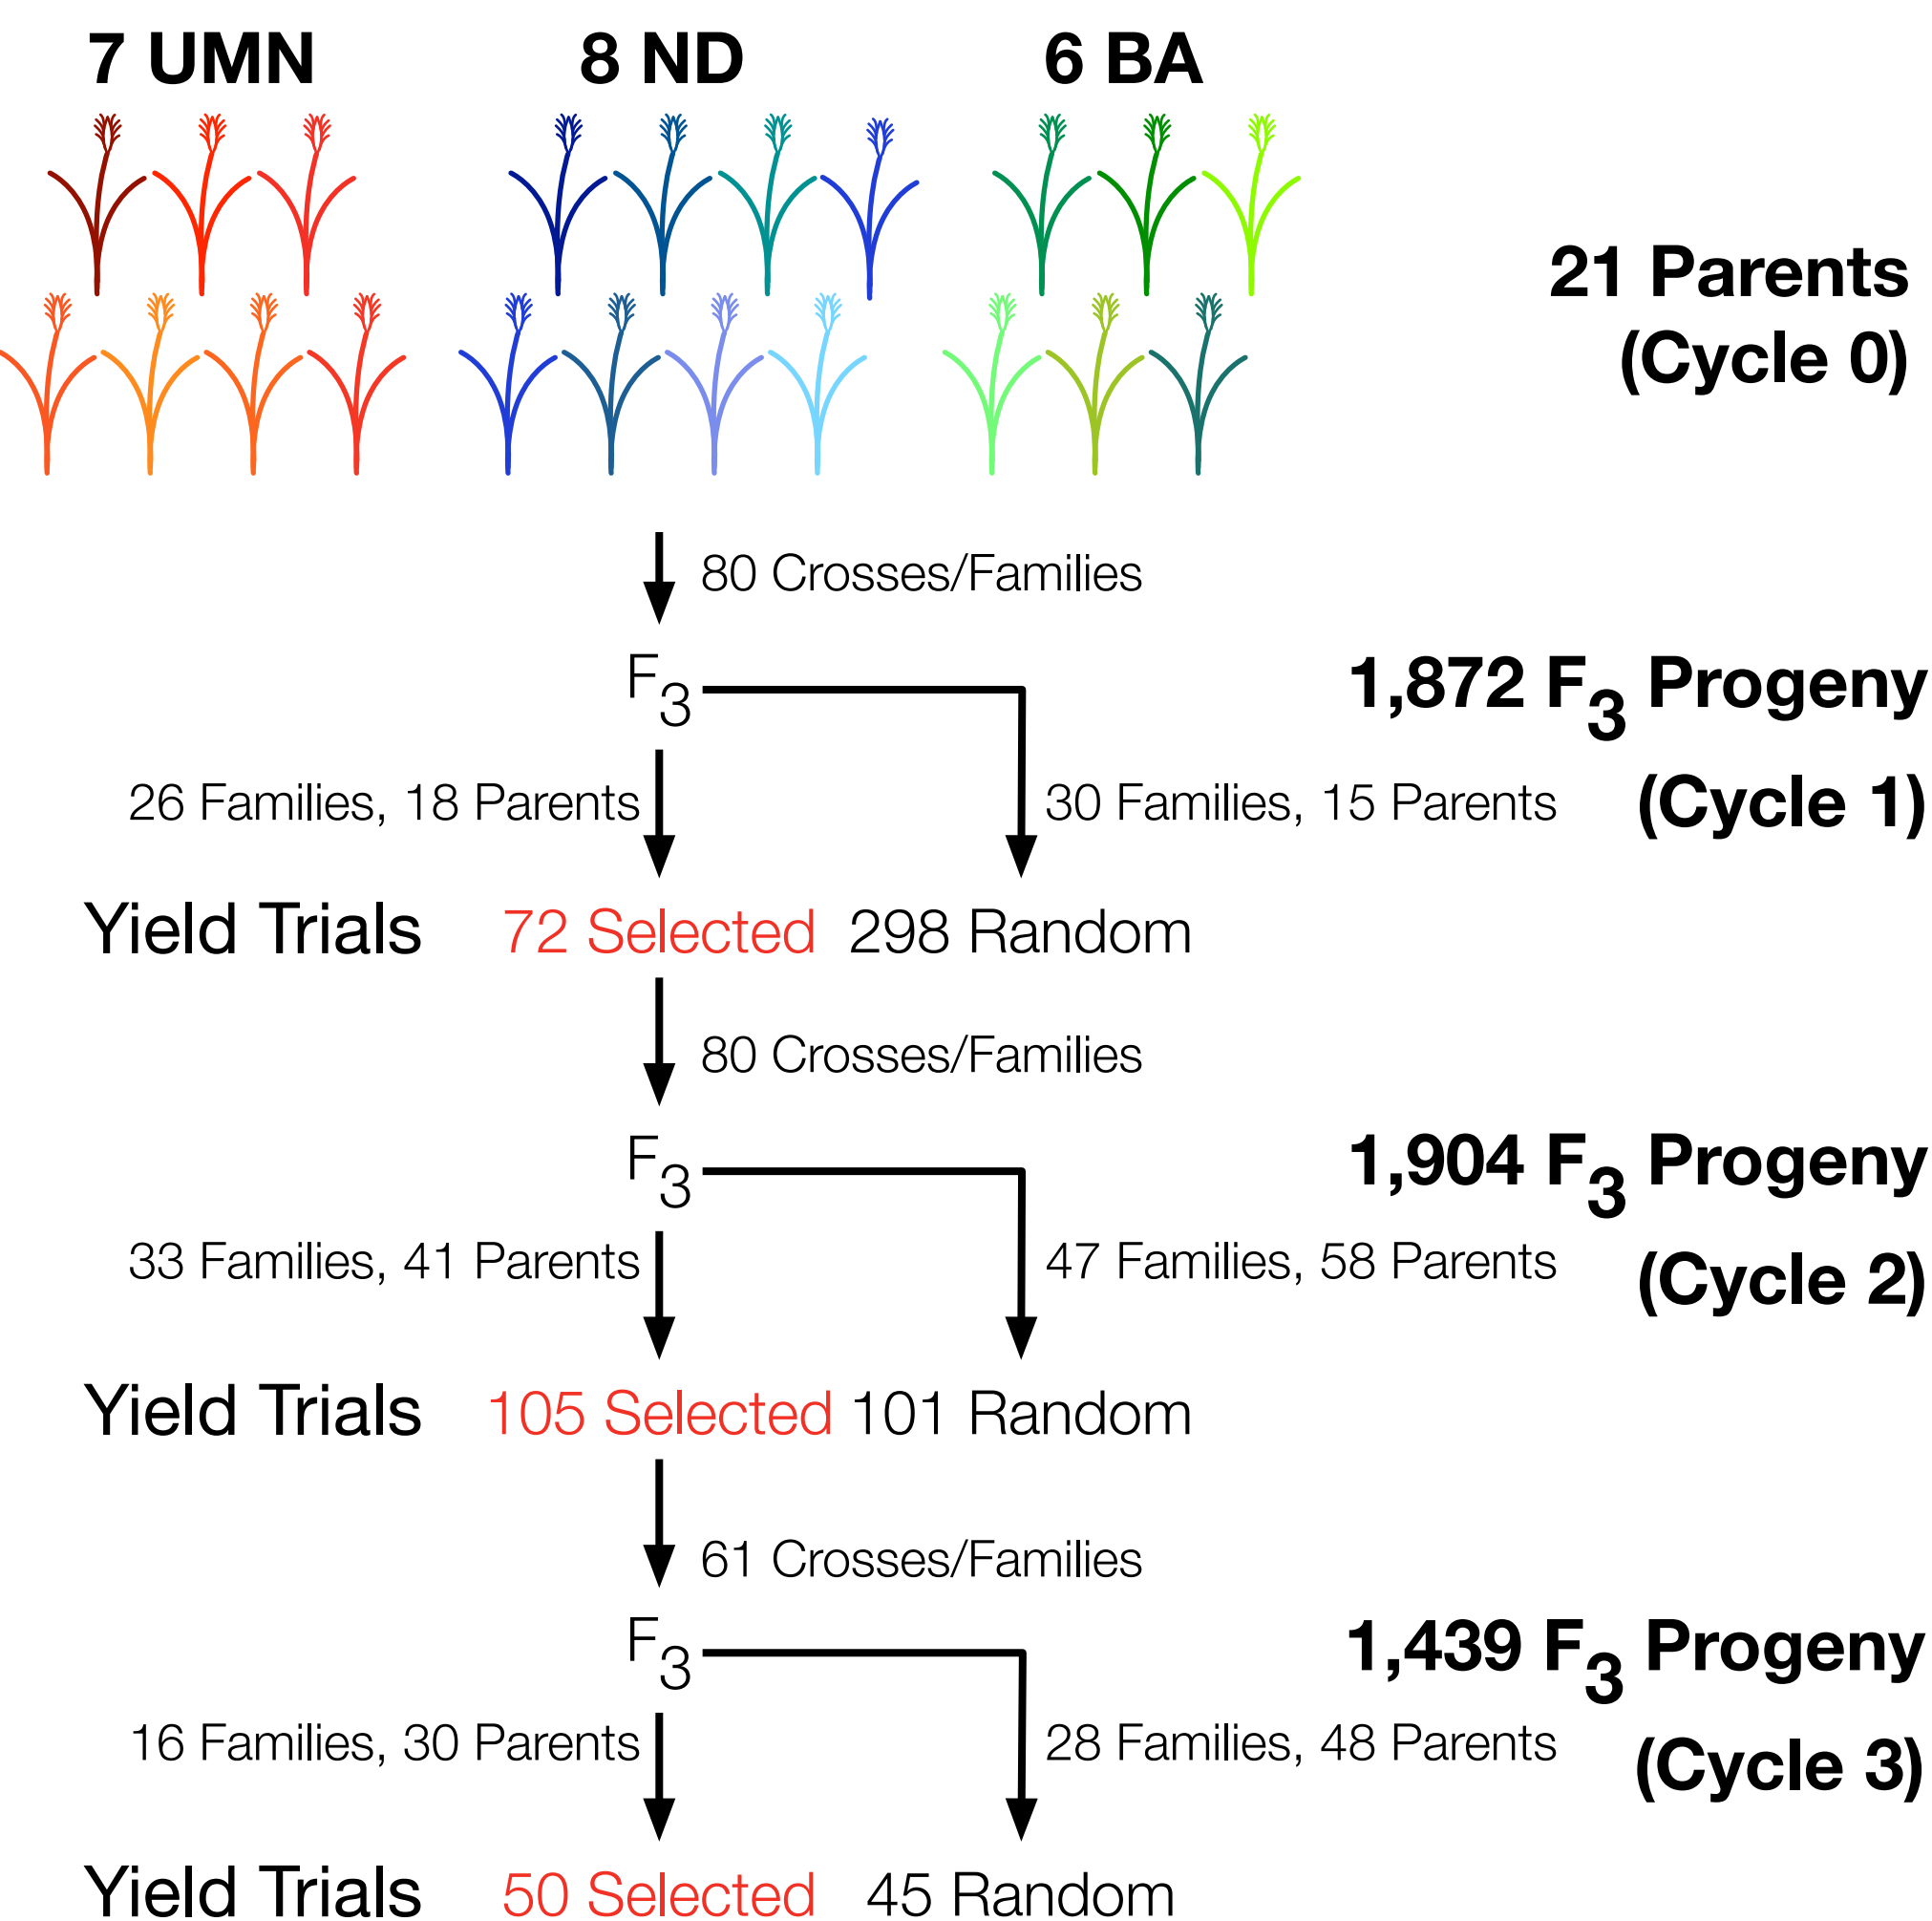

Supplement: Supplementary file 2 [file 3]

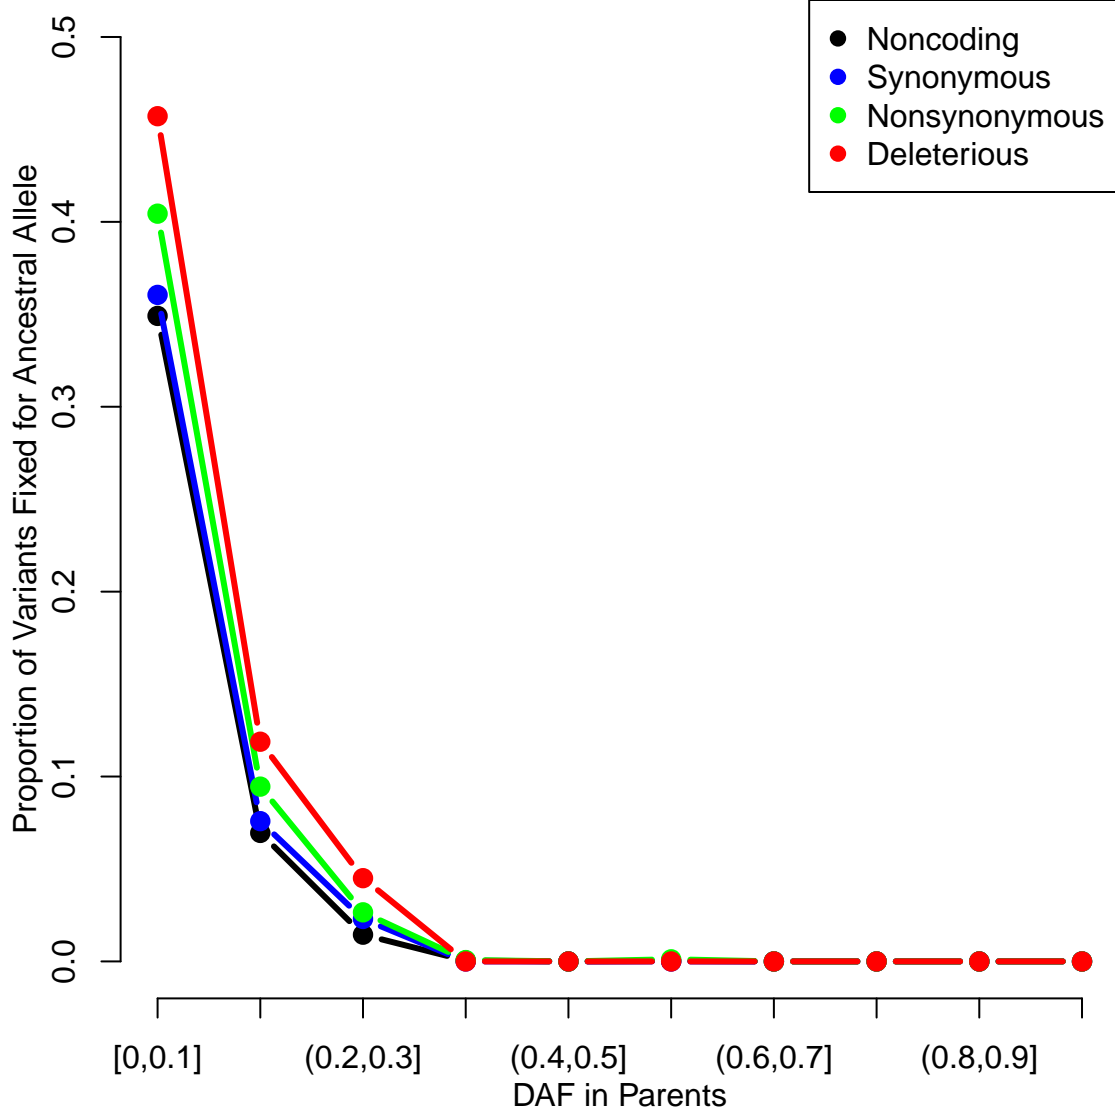

Supplement: Supplementary file 3 [file 3]

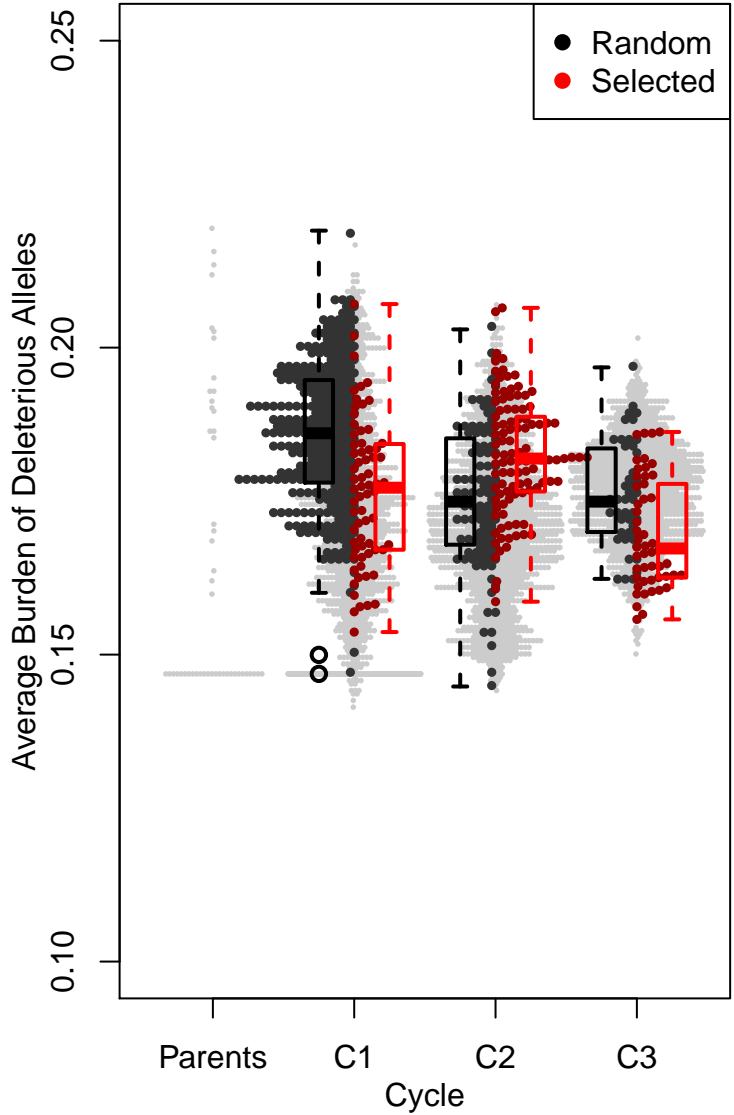

Supplement: Supplementary file 4 [file 3]

Folded SFS in Parents

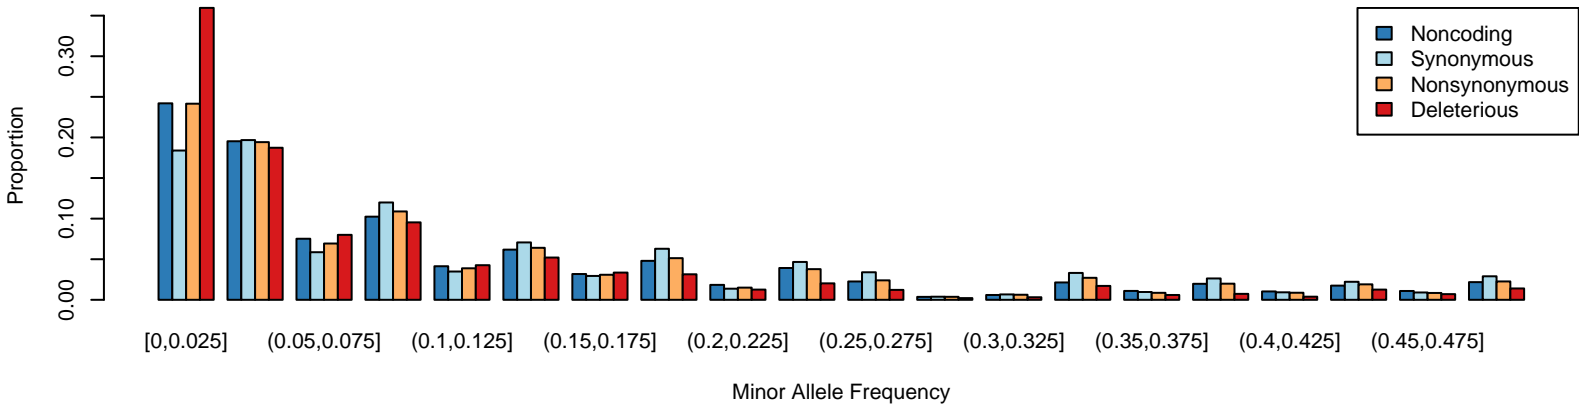

Folded SFS in Cycle 1

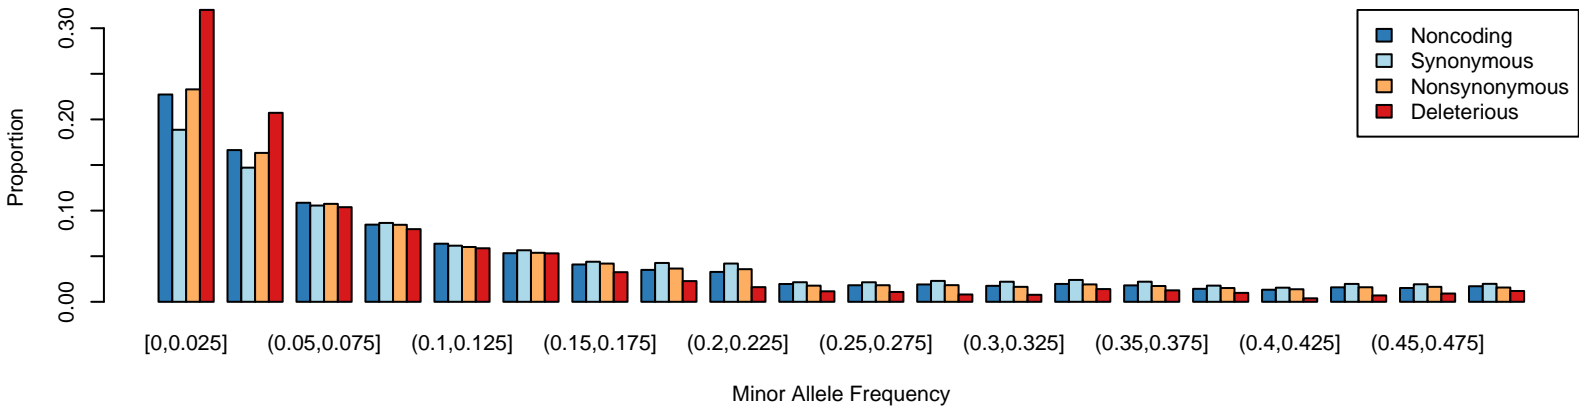

Folded SFS in Cycle 2

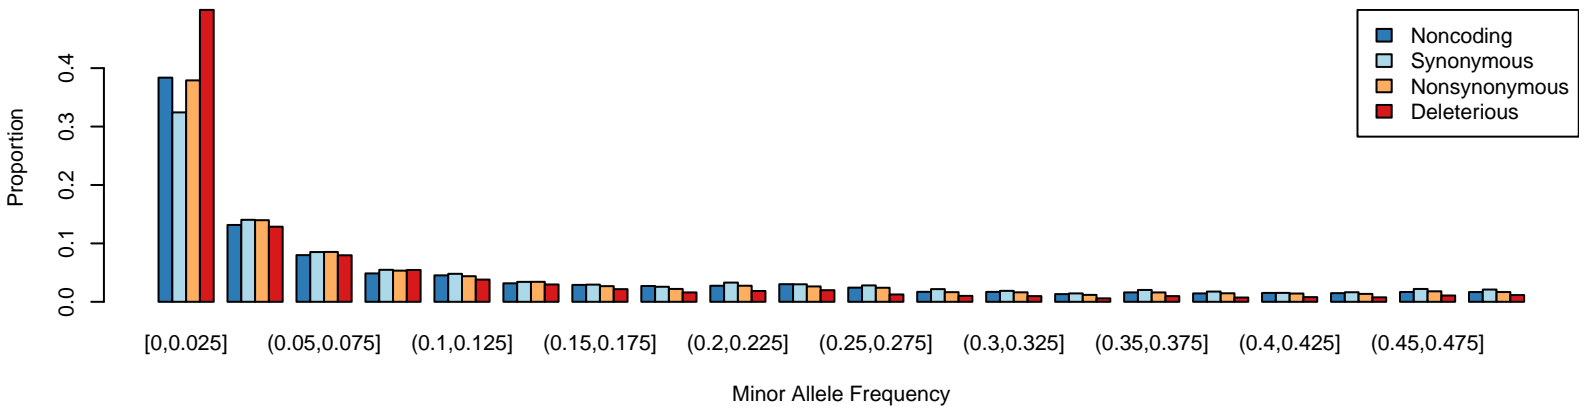

Folded SFS in Cycle 3

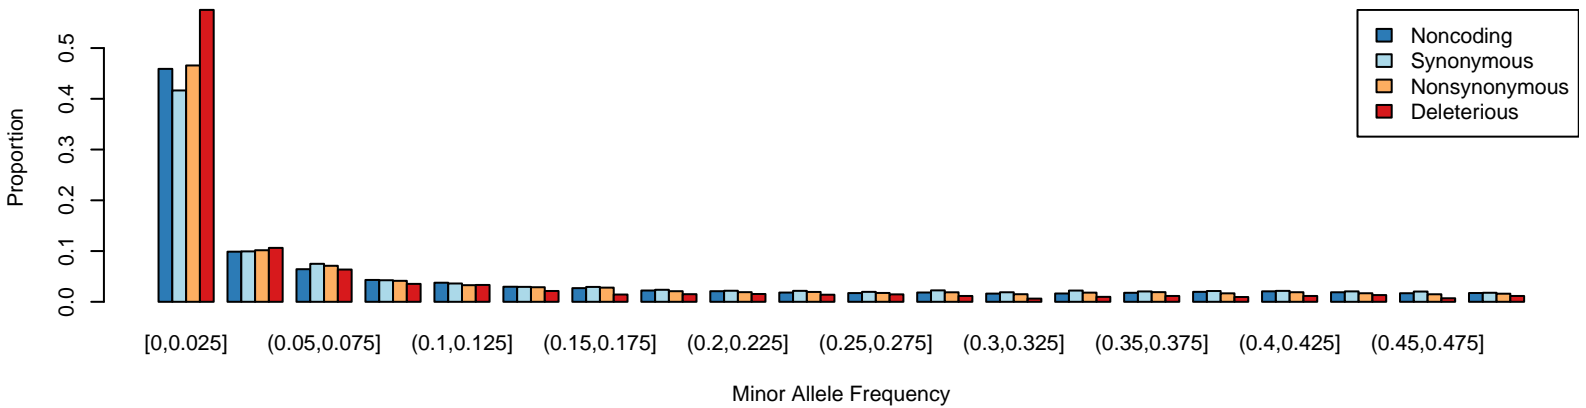

Supplement: Supplementary file 5 [file 3]

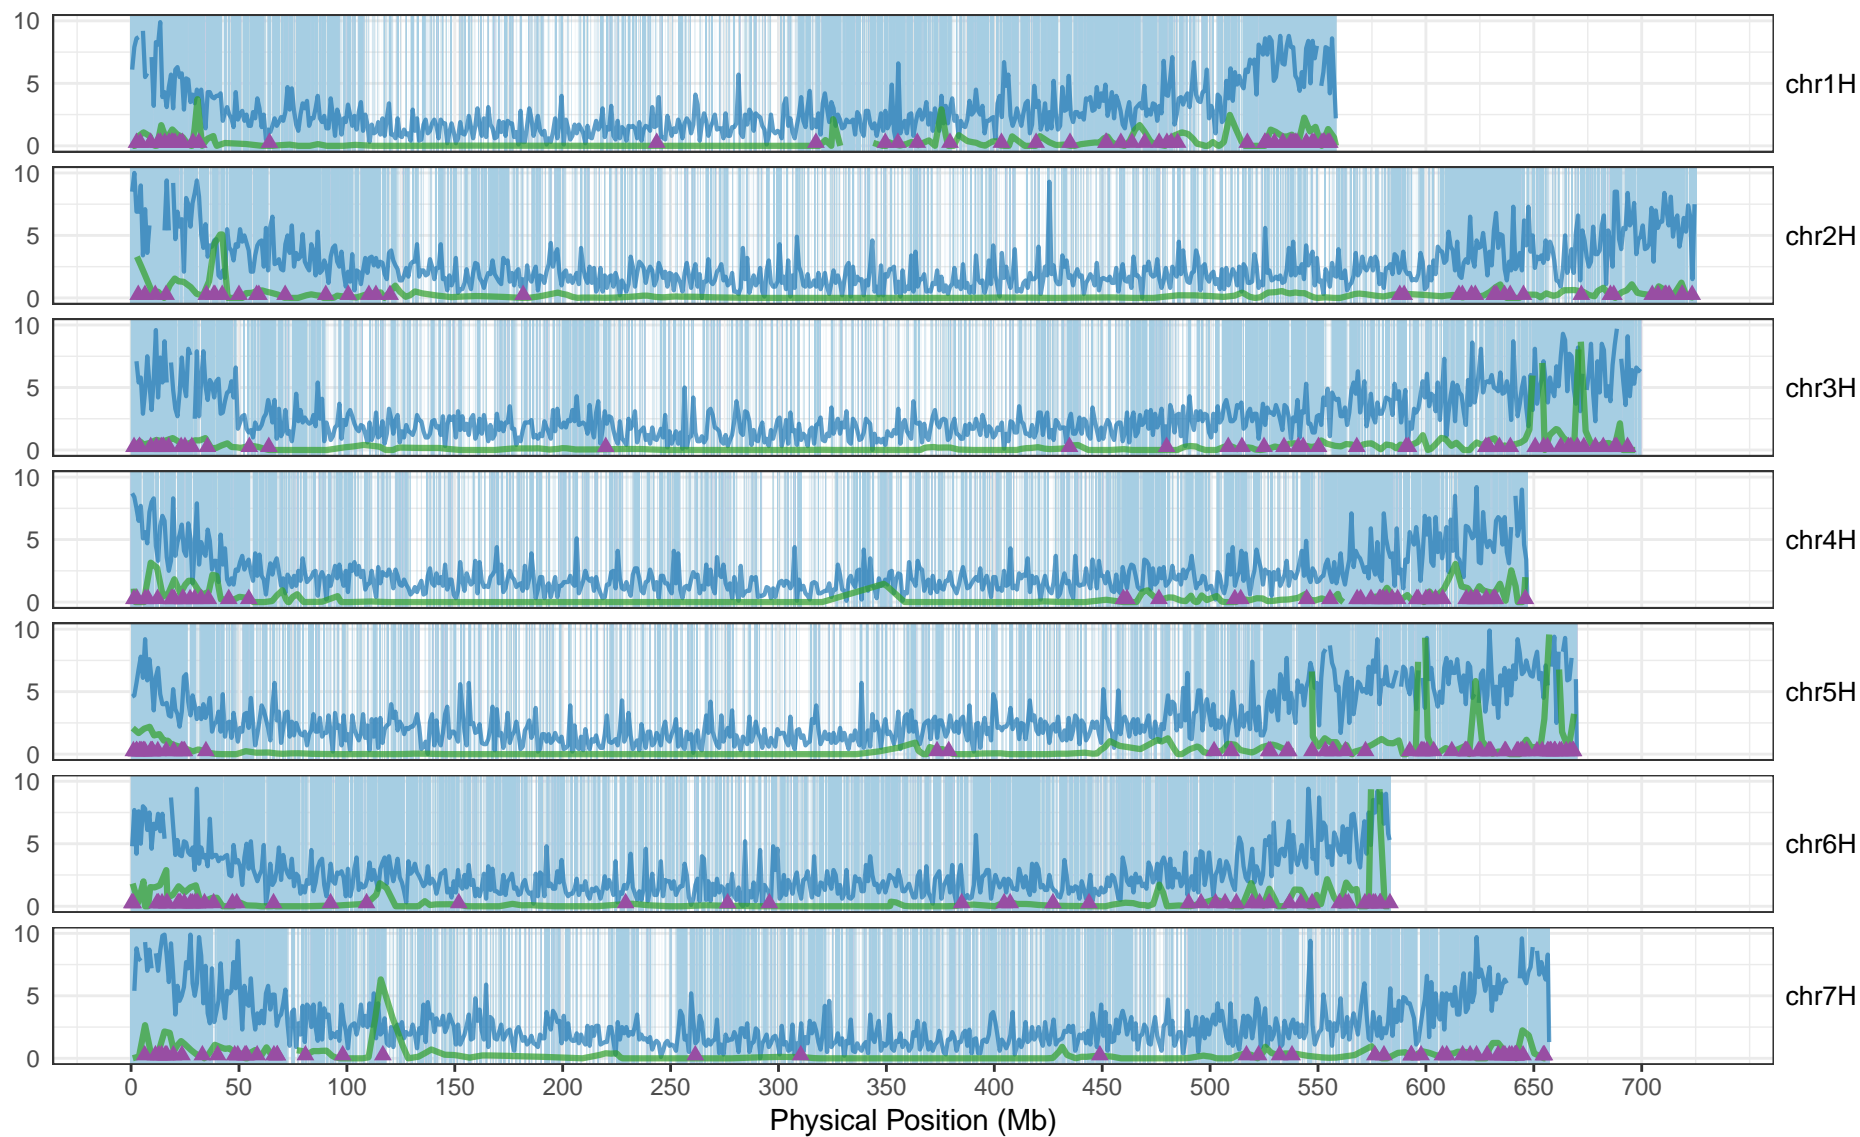

Supplement: Supplementary file 6 [file 3]

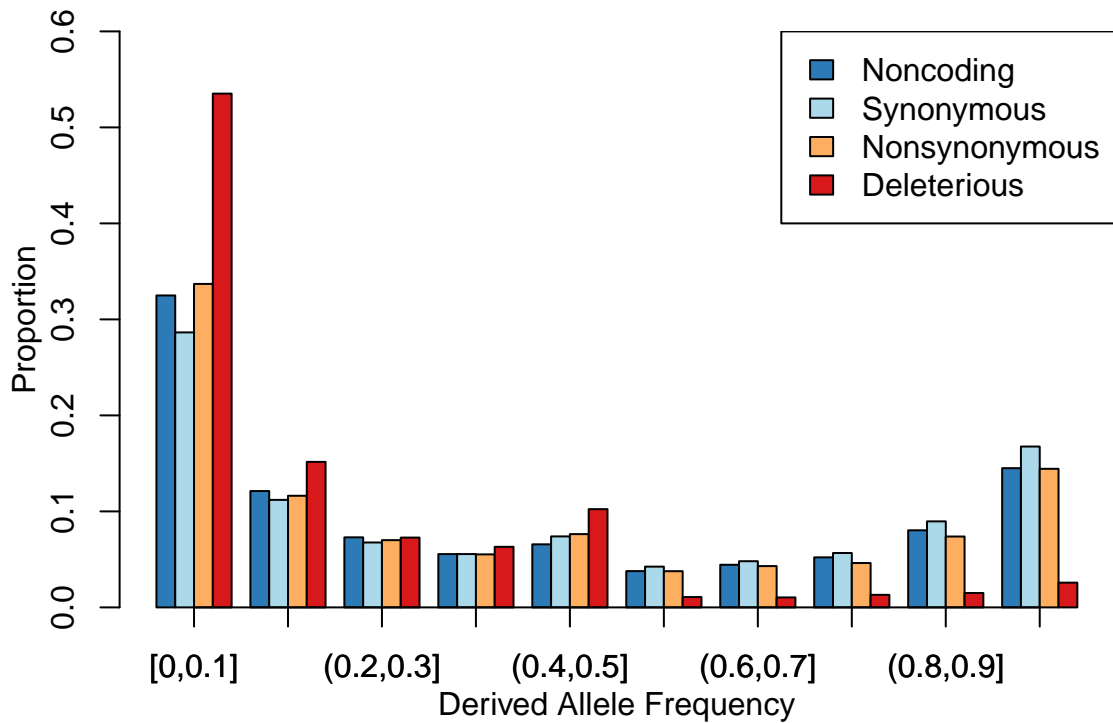

Supplement: Supplementary file 7 [file 3]
